# Supplementary material for: The role of hydrophobic hydration in the LCST behaviour of POEGMA300 by all-atom molecular dynamics simulations
Source: Royal Society of Chemistry journal article supplement (doi:10.1039/c8cp02026d), 2018-01-01
Supplement: c8cp02026d1.pdf [file c8cp02026d1.pdf]

## Supporting Information

### **The role of hydrophobic hydration on the LCST behaviour of POEGMA<sub>300</sub> by all-atom molecular dynamics simulation**

**Eray Dalgakiran, Hasan Tatlipinar \***

Department of Physics, Faculty of Arts and Sciences, Yildiz Technical University, 34220, Istanbul, Turkey

Correspondence to: H. Tatlipinar (E-mail: htatli@yildiz.edu.tr)

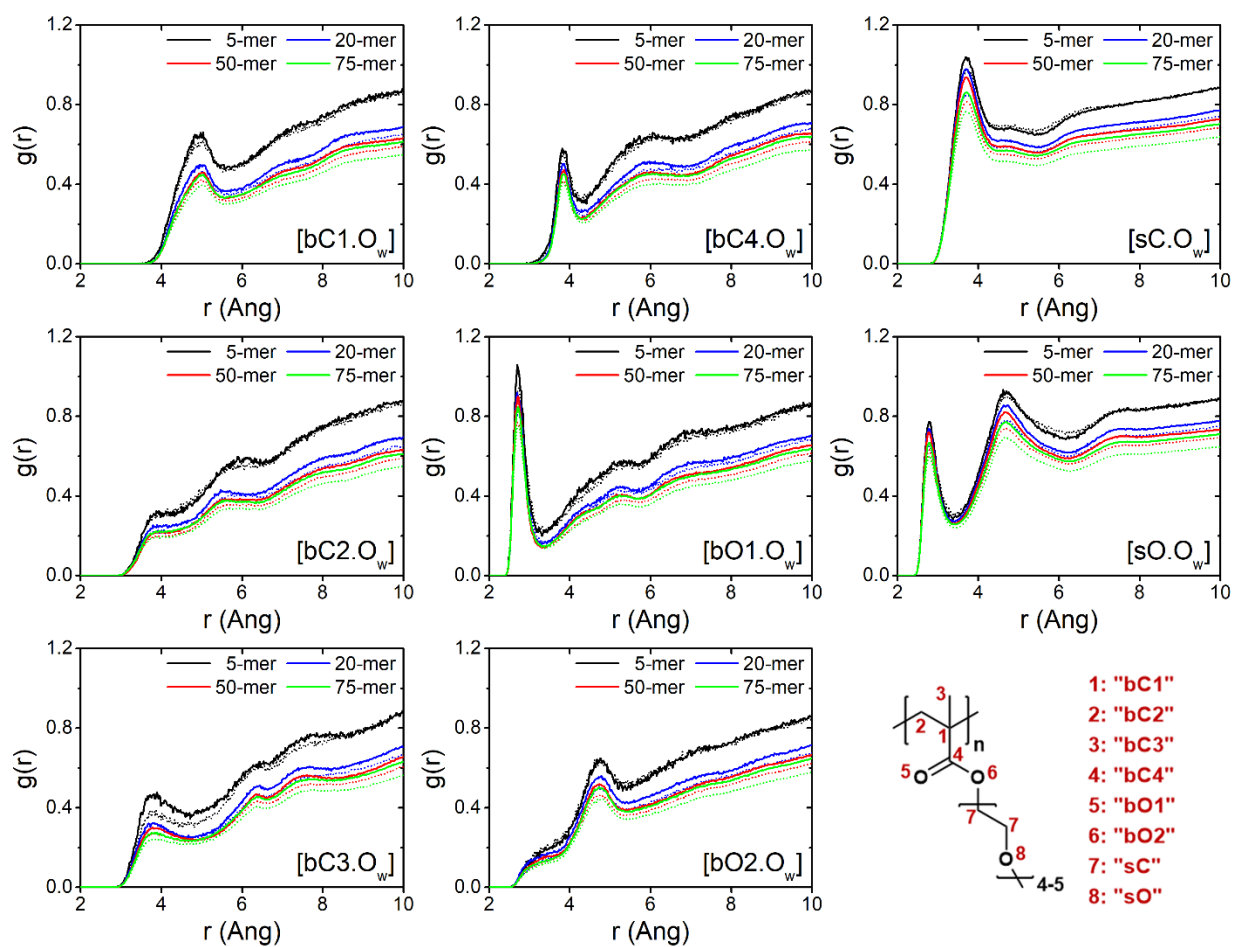

**Fig. S1** Radial distribution functions between selected POEGMA<sub>300</sub> atoms and water oxygen atoms (O<sub>w</sub>) at T < LCST (307 K, solid lines) and T > LCST (350 K, short dot lines).

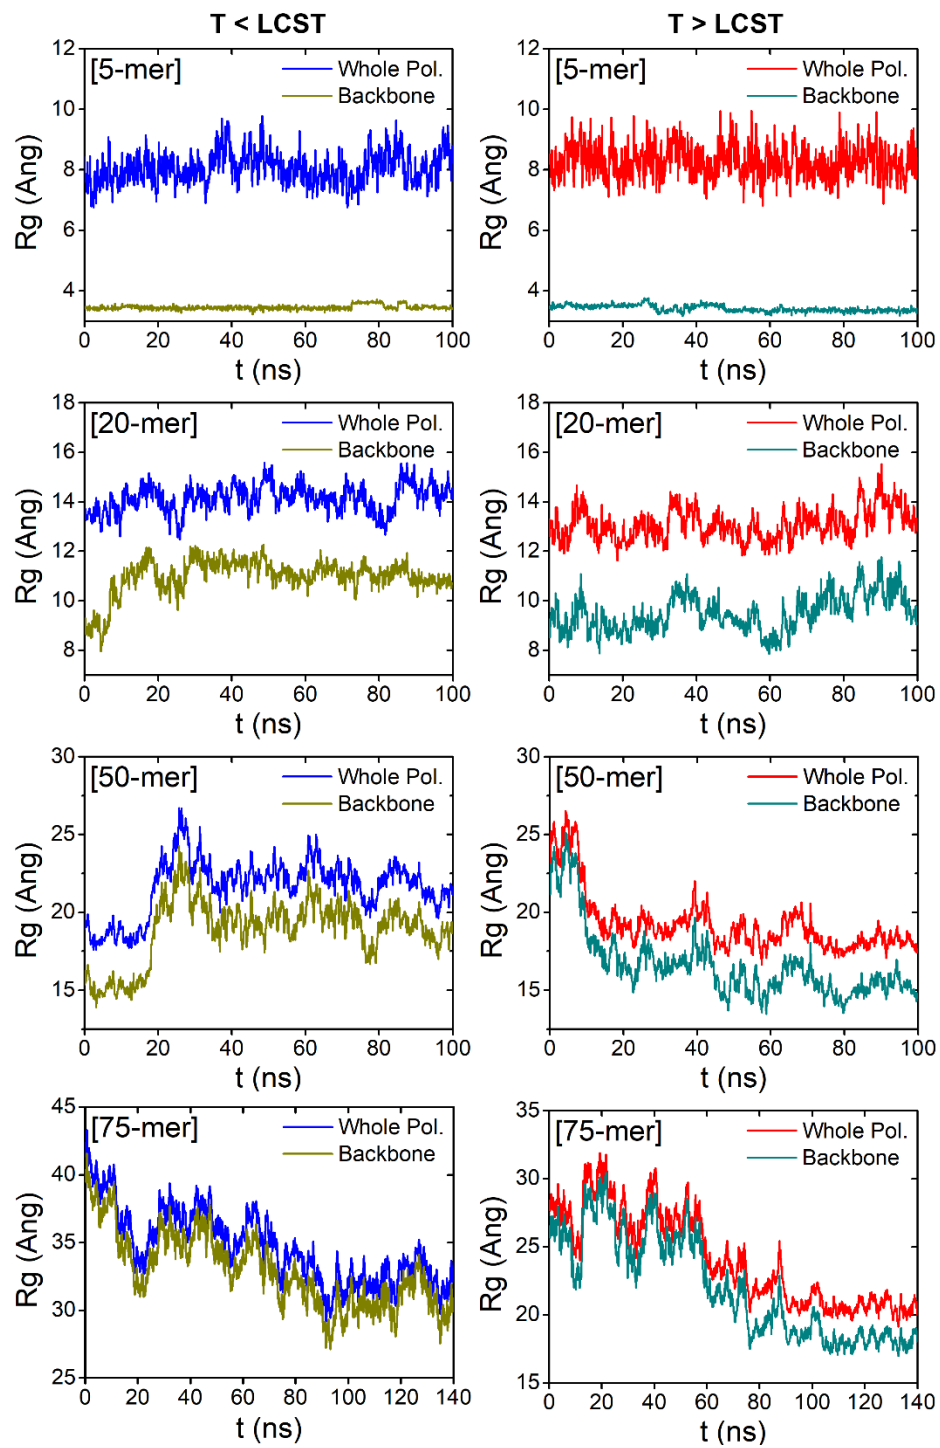

**Fig. S2** Time-dependent radius of gyration ( $R_g$ ) variations of 5-, 20-, 50- and 75-mer POEGMA<sub>300</sub> polymers for the whole polymer and backbone at  $T < LCST$  307 K) and  $T > LCST$  (350 K).

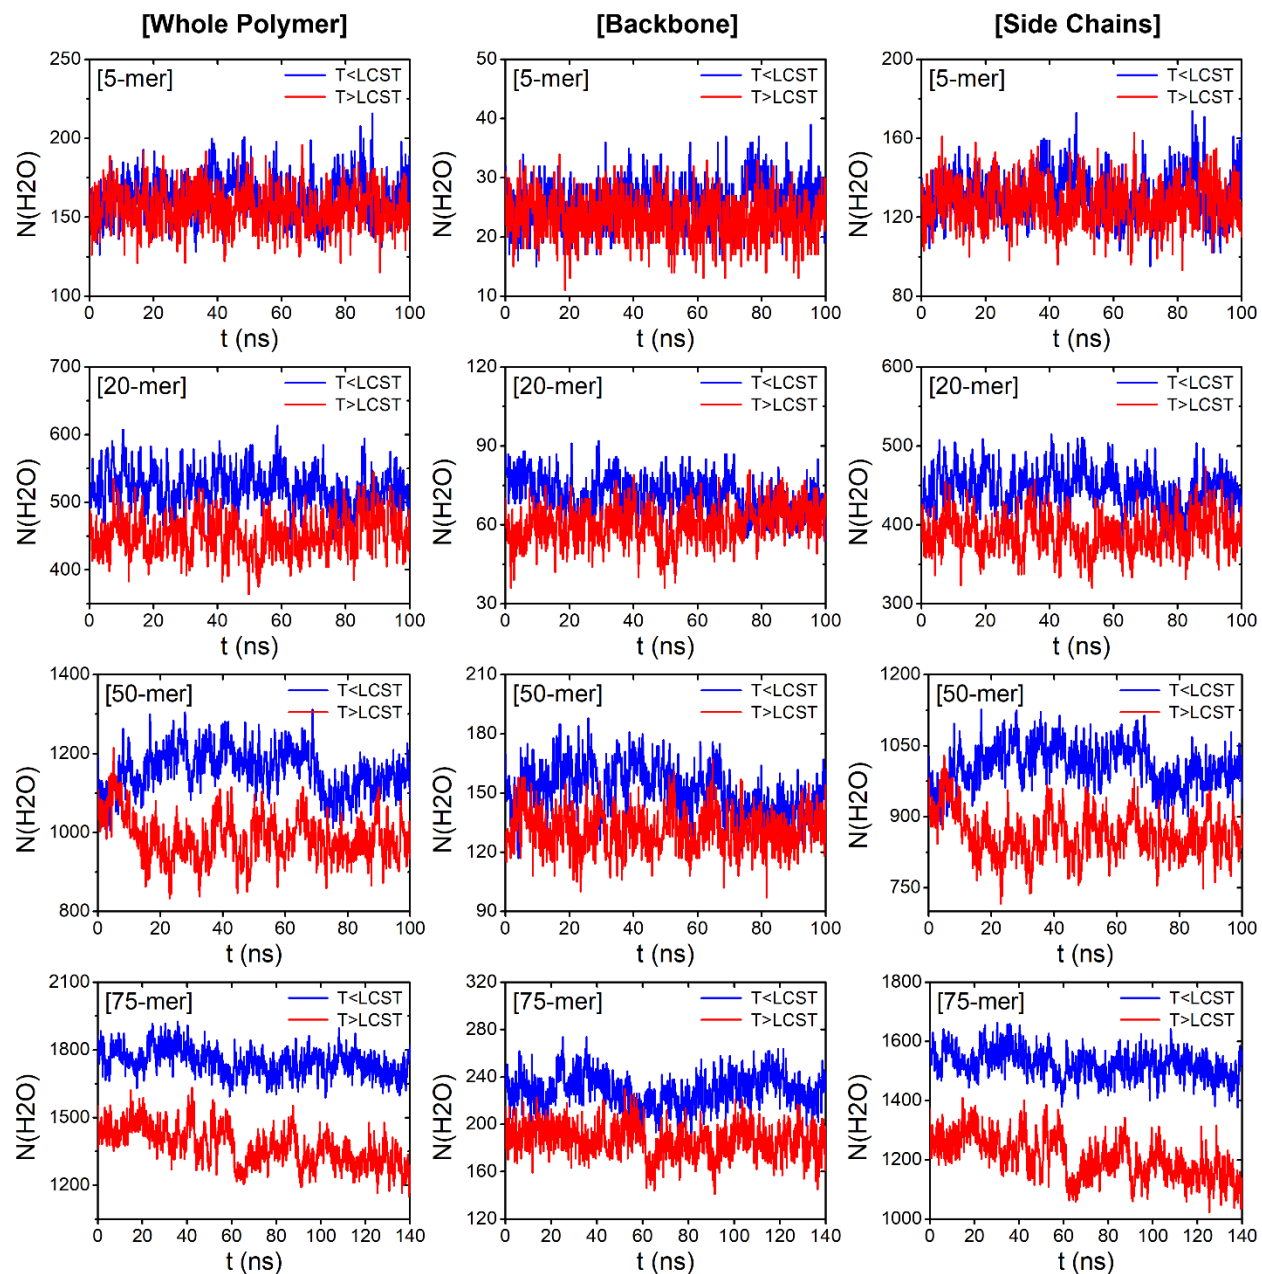

**Fig. S3** Time-dependent number of first shell water molecules variations of 5-, 20-, 50- and 75-mer PEOGMA<sub>300</sub> polymers at  $T < \text{LCST}$  (307 K) and  $T > \text{LCST}$  (350 K) for whole polymer, backbone and oligo(ethylene glycol) side chains.
